## Rolling with the flow: Bumblebees flying in unsteady wakes

Sridhar Ravi<sup>1\*</sup>, James Crall<sup>1</sup>, Alex Fisher<sup>2</sup> and Stacey Combes<sup>1</sup>

<sup>1</sup>Dept. of Organismic and Evolutionary biology, Harvard University, Cambridge, MA 02138, USA

<sup>2</sup>Sch. Of Aerospace, Mechanical and Manufacturing Engineering, RMIT University, Melbourne, Vic 3000, Australia

\* Author for correspondence (sravi@fas.harvard.edu)

### ABSTRACT

Our understanding of how variable wind in natural environments affects flying insects is limited, because most studies of insect flight are conducted in either smooth flow or still air conditions. Here, we investigate the effects of structured, unsteady flow (the von Karman vortex street behind a cylinder) on the flight performance of bumblebees (*Bombus impatiens*). Bumblebees are “all-weather” foragers and thus frequently experience variable aerial conditions, ranging from fully mixed, turbulent flow to unsteady, structured vortices near objects such as branches and stems. We examined how bumblebee flight performance differs in unsteady *versus* smooth flow, as well as how the orientation of unsteady flow structures affects their flight performance, by filming bumblebees flying in a wind tunnel under various flow conditions. The three-dimensional flight trajectories and orientations of bumblebees were quantified in each of three flow conditions: (1) smooth flow, (2) the unsteady wake of a vertical cylinder (inducing strong lateral disturbances) and (3) the unsteady wake of a horizontal cylinder (inducing strong vertical disturbances). In both unsteady conditions, bumblebees attenuated the disturbances induced by the wind quite effectively, but still experienced significant translational and rotational fluctuations as compared to flight in smooth flow. Bees appeared to be most sensitive to disturbance along the lateral axis, displaying large lateral accelerations, translations, and rolling motions in response to both unsteady flow conditions, regardless of orientation. Bees also displayed the greatest agility around the roll axis, initiating voluntary casting maneuvers and correcting for lateral disturbances mainly through roll in all flow conditions. Both unsteady flow conditions reduced the upstream flight speed of bees, suggesting an increased cost of flight in unsteady flow, with potential implications for foraging patterns and colony energetics in natural, variable wind environments.

Key words: Bumblebee flight, flight stability, von Karman street, unsteady flows, turbulence

Short title: Bumblebee flight through vortices

## 31 INTRODUCTION

32 Volant insects employ a variety of unsteady fluid-mechanic phenomena to remain airborne, including  
33 leading edge vortex generation (Ellington et al., 1996), wake capture during hovering (Dickinson et al.,  
34 1999), rotational circulation during pronation and supination (Dickinson et al., 1999), and reduction of  
35 the Wagner effect via clap and fling (Miller and Peskin, 2009). Over the past two decades, our  
36 understanding of these phenomena has been significantly improved by studies exploring the flow field  
37 over insect wings in free and/or tethered flight conditions, and through the use of dynamically scaled  
38 robotic models (see, Sane, 2003 and Wang, 2005 for reviews). Nearly all experiments on insect flight  
39 aerodynamics have been conducted within the confines of laboratories, in the absence of external flow  
40 (i.e. still air) or in very smooth flow produced by laminar wind tunnels. However, the vast majority of  
41 insects reside in the outdoor environment, within the Atmospheric Boundary Layer (ABL) that extends to  
42 a few hundred meters above the Earth's surface, where atmospheric properties (wind, temperature,  
43 humidity, etc.) are significantly influenced by the terrain (Stull, 1988). Though migrating insects routinely  
44 fly at much higher altitudes ( $> 1000$  m) and are assisted by large-scale meteorological events, these  
45 insects too descend to the surface layer for tasks such as feeding, resting, and mating (see Drake and  
46 Farrow, 1988 and Chapman et al., 2011).

47 Flight within this region of the atmosphere can be challenging, even in wind-free conditions, because  
48 the Earth's surface is seldom flat, and it contains numerous natural and man-made structures that  
49 hinder straight, level flight. Wind conditions within the ABL are highly variable, due in part to pressure  
50 differences induced by meteorological phenomena and Coriolis forces arising from the Earth's rotation.  
51 Excluding extreme weather events, mean wind speeds in the ABL generally vary from 0 m/s (still air) to  
52 10 m/s (strong breeze), and wind direction can change rapidly (Stull, 1988). Diurnal insects are further  
53 challenged by stronger daytime winds due to convection from the Earth's surface. Some insects may be  
54 forced to cease flying in windy weather (Feltwell, 1982 Hendry, 1989 and Combes and Dudley, 2009),  
55 but many appear to be capable of contending with the adverse effects of strong, variable environmental  
56 airflow through active and/or passive flight control strategies (Crall and Combes, 2013). While some  
57 recent studies have investigated the effects of large-scale weather phenomena on insect flight,  
58 particularly related to long-distance migration (Chapman et al., 2011), the effects of variable wind  
59 patterns on insect flight at shorter time-scales within the ABL remain virtually unexplored.

60 The interaction between airflow and the terrain, which imposes obstacles in the wind's path, can result  
61 in highly complex and turbulent flow fields (Watkins et al., 2006). While the flow far away from

62 obstacles is generally well mixed and turbulent, flow in the near wake can be significantly different, with  
63 objects such as trees, branches, and flowers producing unsteady but structured flow fields similar to  
64 those seen in the wake of bluff bodies. Here, we investigate the effects of unsteady, structured flow in  
65 the wake of bluff bodies on the flight performance of bumblebees. Bumblebees are ideal subjects for  
66 studying the effects of unsteady wind on insect flight, as they continue to forage even in adverse  
67 weather conditions (Heinrich, 2004 and Crall and Combes, 2013) and thus are likely to experience a wide  
68 range of environmental flow conditions.

69 We measured instantaneous position and orientation of bees as they flew upstream in a wind tunnel  
70 through smooth flow, as well as through the unsteady, von Karman vortex street present in the wake of  
71 a circular cylinder. The cylinders used to generate unsteady flows may be considered as abstracts of the  
72 tree trunks or branches that bees would routinely fly around while foraging in windy weather. We also  
73 investigated the effects of the orientation of the flow disturbance by generating flows behind both a  
74 vertical and a horizontal cylinder, which induced strong lateral and vertical disturbances, respectively.

75 Several recent studies have revealed that body orientation and translational motions are tightly coupled  
76 in some flying insects (e.g., in both hawkmoths and bumblebees, pitch angle is coupled to  
77 longitudinal/forward motion (Dudley and Ellington, 1990 and Willmott and Ellington, 1997  
78 respectively)). However, these coupled motions have primarily been examined during voluntary  
79 maneuvers such as turning, ascending or accelerating, and therefore reflect active control strategies  
80 initiated by the insect. The passive response of flying insects subjected to unexpected aerodynamic  
81 disturbances may be very different, and rotational and translational motions may not be coupled in the  
82 same way. In addition, the passive responses of insects to external flow disturbances may differ  
83 between species, depending on morphology and flight kinematics. For example, honeybees subjected  
84 to an isolated gust of wind display large rolling motions, whereas stalk-eye flies subjected to the same  
85 disturbance display significant yaw as well as roll (Vance et al., 2013). Identifying the body axes about  
86 which insects are least stable to external perturbations, as well as the coupled rotational and  
87 translational motions employed during active maneuvering is a critical step in understanding how flying  
88 insects negotiate complex, natural aerial environments.

89 We compared the performance of bees flying in smooth and unsteady, structured flow to address three  
90 main questions: (1) How does unsteady, structured flow affect the trajectory and flight speed of  
91 bumblebees?, (2) How does unsteady flow affect the orientation and stability of bumblebees?, and (3)

92 Do flow disturbances oriented vertically or horizontally produce equivalent responses along the  
93 corresponding axes of flying bees?

## 94 **MATERIALS AND METHODS**

### 95 ***Study specimens and flight tests***

96 Bumblebees (*Bombus impatiens*) from a commercial breeder (BioBest) were maintained in the lab and  
97 given continuous access to a foraging chamber where they could feed freely from an artificial, purple  
98 flower containing linalool-scented nectar. Fourteen individuals of similar size (body length = 14 mm  $\pm$  0.5  
99 mm, mass = 165 mg  $\pm$  10%) were selected for flight experiments.

100 Each bee was isolated from the hive and cold anesthetized, and a marker (discussed below) was affixed  
101 to the dorsal surface of its thorax using cyanoacrylate glue. The marked bee was then placed in a  
102 transparent chamber (0.4 x 0.4 x 0.4 m) and allowed to recover and fly freely, without access to food, for  
103 approximately two hours prior to the experiment.

104 Once sufficiently starved, each bee was placed in the wind tunnel (with no airflow) where it could feed  
105 from an artificial flower resembling the one in the foraging chamber. Once feeding commenced, the bee  
106 was allowed to feed for approximately 10 seconds, then separated from the nectar source and released  
107 at the downstream end of the wind tunnel. If the bee did not fly towards the artificial flower, it was  
108 manually re-introduced to the nectar source and subsequently separated. This cycle was repeated until  
109 the bee flew directly to the nectar source. Once consistent behavior was established, wind was  
110 introduced and bees were filmed as they flew upstream through smooth flow or an unsteady flow field.  
111 Each bee was flown sequentially in each of the three flow conditions, with the order of flow conditions  
112 randomized between individuals.

113 Experiments were conducted in a 6 m long suction-type open-return wind tunnel with a 0.9 x 0.5 x 0.5 m  
114 working section. The wind-speed was set to  $\sim$ 2.55 m/s, which represents an intermediate cruising  
115 velocity for bumblebees (Ellington, 1991). To generate structured, unsteady flow, a circular cylinder with  
116 a diameter of 25 mm, corresponding to the average wing span of the bumblebees, was placed at the  
117 inlet of the test section, extending across the width of the working section. The artificial flower that bees  
118 flew towards was positioned within the cylinder in the unsteady trials (Fig. 1A). To maintain behavioral  
119 consistency in the smooth flow trials, we attached a small ( $\sim$ 5 mm diameter) artificial flower to the  
120 upstream mesh of the wind tunnel.

121 This method of unsteady flow generation gives rise to a von Karman vortex street in the wake of the  
122 cylinder (Fig. 1A), and has been employed by a number of researchers examining the influence of  
123 unsteady flow on swimming and flying animals (Liao et al., 2003; Beal et al., 2006; as well as Hedrick et  
124 al. in this issue). At the chosen velocity, the spatial scales of the vortices emanating from the cylinder are  
125 on the order of the wing span of the bees. While there exists limited understanding of the influence of  
126 various scales of unsteady flow structures on flapping flight performance, we hypothesize that  
127 disturbances on the order of the bee's wing span would produce greatest instability; disturbances many  
128 orders of magnitude greater would be experienced as quasi-steady changes in oncoming flow, whereas  
129 those many orders of magnitude smaller would average out across the body to produce minimal  
130 disturbance.

131 We filmed bees and quantified airflow within a specific interrogation volume (a cube with side lengths of  
132 100 mm, located 100 mm downstream from the cylinder; Fig. 1A). The downstream distance was chosen  
133 to avoid the recirculating region in the near wake of the cylinder and to allow the formation of a full von  
134 Karman vortex street. Fluctuations in flow velocity within this volume were quantified in the absence of  
135 bees, using a three component hot-wire anemometer sampling at 1kHz, calibrated against a standard  
136 pitot-static tube.

137 During flight trials, bees were filmed as they flew through the interrogation volume using two Photron  
138 SA3 high-speed cameras sampling at 1000 Hz, placed above the wind tunnel at approximately 30° from  
139 the vertical. A static calibration cube that filled the volume of interest was used for spatial calibration via  
140 direct linear transformation (Hedrick, 2008).

141 Triangular markers were manually placed on the thorax of bees to enable estimation of bees' position  
142 and orientation. The markers consisted of three black points representing the vertices of an isosceles  
143 triangle (measuring 2.7 x 2.3 mm) set upon a white background (Fig. 2B). Footage of the bees in flight  
144 revealed that the marker was well removed from the wings and did not interfere with wing kinematics.

#### 145 ***Kinematic reconstruction and analysis***

146 The recorded flight sequences were digitized using an open-source MATLAB-based routine, DLTdv5  
147 (Hedrick, 2008), utilizing the automated tracking feature to localize the three black points on the  
148 triangular marker throughout each sequence. Subsequent analysis of the bee's position and orientation  
149 was performed in MATLAB. Reconstructed data were filtered with an 8th-order Butterworth low pass  
150 filter with a cutoff frequency of 200 Hz to reduce error due to marker localization (see Error Estimation,

151 below). The software utilizes Direct Linear Transformation (DLT) to calculate the location of an arbitrary  
 152 point in 3D space based on the location of the point on each camera’s view. For all flight sequences only  
 153 the three black points on the marker (Fig. 2B) were digitized.

154 Mean ground speed of bees was calculated by numerically integrating the absolute flight path of the bee  
 155 and dividing it by the total flight time. Mean air speed of bees along their flight path was calculated as  
 156 the sum of the mean wind speed in the interrogation volume and the mean ground speed traveled by  
 157 the bee:

$$(\text{Mean air speed})_{Tot,x,y,w} = \frac{(\text{Total distance travelled})_{Tot,x,y,w}}{\text{Total time}} + (\text{Mean wind speed})_{Tot,x,y,w}$$

158  
 159 In smooth flow conditions, the mean wind speed was uniform within the interrogation volume;  
 160 however, in the wake of the cylinder, mean streamwise velocity varied slightly across the control volume  
 161 (Fig. 1B). Because simultaneous measurement of the bee’s position and instantaneous wind speed at  
 162 that particular position is impractical, we used the mean wind speed across the interrogation volume  
 163 combined with the bee’s ground speed to estimate mean air speed in unsteady flow trials. This method  
 164 of air speed estimation was considered reasonable because variation in mean wind speed across the  
 165 interrogation volume was relatively limited, and the flight time of the bees was much greater than the  
 166 advective time scales of the von Karman vortices.

167 To further elucidate the influence of unsteady flows on the bees’ flight trajectories, ground speeds of  
 168 bees in the longitudinal, lateral and vertical directions (in a global coordinate system; Fig. 2B) were  
 169 calculated separately and compared between flow conditions. For all flow conditions there was no mean  
 170 wind in either the lateral or vertical direction, hence the lateral and vertical airspeeds were equal to  
 171 their respective ground-speeds. Standard deviations of velocity along each axis in each trial were  
 172 calculated to compare the relative strength of velocity fluctuations along each axis. Power spectra of  
 173 bee velocity along each axis were calculated using the Welch method of spectral estimation in MATLAB,  
 174 to identify dominant frequencies of motion. Because bumblebees typically adopt a “casting” flight path,  
 175 flying slowly from side to side as they move upstream, we also examined the standard deviations of  
 176 velocities subjected to a 3 Hz high-pass filter, to separate the higher frequency components of the bees’  
 177 velocity fluctuations from the low-frequency casting behavior. The cutoff frequency of 3 Hz was chosen  
 178 arbitrarily, based on the power spectra of bee velocity; however, sensitivity to cutoff frequency was

179 evaluated, and the filtered results were found to be relatively insensitive to cutoff frequency over a  
180 range of ~ 3-10 Hz.

181 Instantaneous acceleration was calculated by numerically differentiating bee velocity. Power spectra of  
182 accelerations along the longitudinal, lateral, and vertical axes were calculated to assess dominant  
183 frequencies of acceleration fluctuations and standard deviations of accelerations were calculated to  
184 compare the magnitude of fluctuations along the three axes.

185 The influence of flow conditions on the body orientation and rotation rates of bees was assessed by  
186 evaluating variation in roll, pitch and yaw angles of the triangular markers, using a rigid body  
187 assumption. As abdomen position was not tracked in the flight sequences, pitch angle estimation  
188 through the conventional method (angle between head-abdomen vector and horizon) could not be  
189 made; however, because most aerodynamic force is produced in the thorax and many insects are known  
190 to actuate their abdomens independently during flight, we chose to use the orientation of the thorax  
191 itself for pitch angle estimation. To calculate instantaneous orientation of the thorax, a local plane was  
192 constructed based on the three points on the triangular marker. The origin of the right-handed local  
193 coordinate system of the plane was placed on the posterior-most point on the marker and translational  
194 components between the local and global coordinate systems were removed (see Fig. 2B). Subsequently  
195 the directional cosine matrix (DCM; i.e., the rotation matrix between the local and global coordinate  
196 systems) was calculated. From the DCM, the Euler angles based on the Roll-Pitch-Yaw (RPY) sequence of  
197 intrinsic rotations was obtained (Diebel, 2006). Conceptually, the RPY angles derived from this method  
198 imply that the instantaneous orientation of the marker (bee) with respect to the neutral position (where  
199 the local and global coordinate systems are coincident), can be described by initially performing a  
200 rotation about the local coordinate x-axis (roll), subsequently a rotation about the local coordinate y-  
201 axis (pitch) and finally a rotation about the local coordinate z-axis (yaw). A similar method was used by  
202 (Walker et al., 2012) and (Nicholas, 2012) to estimate the orientation of freely flying hoverflies and  
203 houseflies, respectively.

204 Power spectra of orientation angles were calculated to identify dominant frequencies of fluctuations in  
205 body rotation around the roll, pitch and yaw axes. To obtain instantaneous rotation rates of bees in the  
206 local coordinate system, the time derivative of the RPY angles was multiplied by the rotation rate matrix  
207 (Diebel, 2006). Mean absolute rotation rates were calculated from the instantaneous angular velocity  
208 data. The rotation data was also treated with a 3 Hz high-pass filter to remove low-frequency casting  
209 motions, as in the translational analyses described above.

210 To understand how body rotations (either voluntary or involuntary) are related to translational motions  
211 of bees, we performed normalized cross-correlation analysis between instantaneous roll/yaw angles and  
212 lateral acceleration, as well as between pitch angle and vertical/longitudinal accelerations.

213 Statistical significance of results was analyzed by performing paired *t*-tests ( $n = 14$  individuals in all  
214 cases) between experimental conditions (smooth flow [S], unsteady wake of horizontal cylinder [ $U_{\text{horiz}}$ ],  
215 and unsteady wake of vertical cylinder [ $U_{\text{vert}}$ ]) in MATLAB.

216

### 217 ***Error estimation***

218 Digitization error in localizing the centroids of marker points is expected to be of the order of 1-2 pixels,  
219 which is much smaller than the mean number of pixels separating the markers ( $\sim 30$ ). This error is  
220 expected to manifest only at higher frequencies, on the order of the Nyquist frequency. The digitized  
221 data were passed through an 8<sup>th</sup> order Butterworth low-pass filter to remove any higher frequency  
222 errors due to the digitization process, with a cutoff frequency of 200 Hz, which is lower than the Nyquist  
223 frequency (500 Hz) but higher than the flapping frequency of the bees ( $\sim 180$  Hz).

224 Error due to the 3D reconstruction process was analyzed using the DLTdv5 MATLAB routine, which  
225 provides residuals (in pixels) from the direct linear transformation performed for each time instant  
226 (Hedrick, 2008). These residuals are the root-mean-square error in the 3D reconstruction of the points  
227 from the camera views, and may be considered a metric for the accuracy of the digitization process. A  
228 low residual is indicative of accurate triangulation of the points in 3D space. To avoid errors in  
229 estimation of orientation angles due to the relatively close proximity of points on the marker, only  
230 sections of flight sequences with DLT residuals  $< 2$  pixels were chosen for further analysis. To further  
231 assess the accuracy of the reconstruction process, the reconstructed distances between marker points  
232 were compared to the actual physical distances between them for each time instant analyzed. For the  
233 flight sequences analyzed (those with DLT residuals  $< 2$ ), the root mean square difference between  
234 reconstructed and actual marker distances was  $< 0.05$  mm, corresponding to an uncertainty of  $< 2\%$ .

235 Markers were affixed to each bee's thorax manually, and thus may have been offset from the bee's  
236 neutral axes by different amounts in the 14 individuals tested. These offsets in marker positioning could  
237 introduce error into the estimation of instantaneous body orientation angles. However, the output  
238 variables used for statistical analysis (standard deviation of rotation angles, mean absolute rotation



239 rates, standard deviation of rotation rates, etc.) were based on changes in orientation angle, and thus  
240 are not affected by slight errors in estimation of actual body orientation angles.

241

## 242 **RESULTS**

### 243 ***Flow conditions***

244 With unimpeded (smooth) flow, a flat velocity profile was present across the interrogation volume (< 2%  
245 variation in mean flow speed, Fig. 1B) and turbulence intensity (standard deviation/mean wind speed)  
246 was less than 1.2%. There were no dominant velocity fluctuations at any particular frequency (Fig. 1C-D),  
247 indicating that the flow disturbance created by the small flower embedded in the upstream mesh was  
248 minimal.

249 When either a horizontal or vertical cylinder was introduced to generate unsteady flow, a deficit in  
250 mean longitudinal velocity could be seen in the wake of the cylinder (as compared to the smooth flow),  
251 and the mean velocity profile varied slightly throughout the interrogation volume (Fig. 1B). Vortex  
252 shedding occurred at 23 Hz (Fig. 1C-D), in agreement with the predicted vortex shedding Strouhal  
253 number of 0.19 (Roshko, 1961; Vickery, 1966). When the cylinder was aligned vertically, strong lateral  
254 velocity fluctuations were induced at the shedding rate (Figs. 1C), and when the cylinder was aligned  
255 horizontally, strong vertical velocity fluctuations were induced (Fig. 1D). Due to the influence of the  
256 counter-rotating vortices, velocity along the dominant axis of disturbance (i.e. lateral flow with the  
257 vertical cylinder, vertical flow with the horizontal cylinder) varied approximately as a square wave.  
258 Smaller velocity fluctuations in the non-dominant directions at 23 Hz can also be seen in the spectra  
259 (Figs. 1C-D), indicating that some 3D effects were present; these may be attributed to ambient  
260 freestream turbulence within the tunnel and small surface non-uniformities of the cylinder.

261

### 262 ***Flight speed and trajectory***

263 Mean air speed of bees along their flight trajectory was lower in unsteady flow as compared to smooth  
264 flow conditions (Fig. 3; paired *t*-tests:  $S-U_{\text{horiz}}$  &  $S-U_{\text{vert}}$ ,  $p \ll 0.0001$ , where *S* is smooth flow, and  $U_{\text{horiz}}$  and  
265  $U_{\text{vert}}$  are unsteady flow behind the horizontal and vertical cylinder, respectively), but did not differ with  
266 orientation of the cylinder ( $U_{\text{horiz}}-U_{\text{vert}}$ ,  $p = 0.55$ ). Similarly, longitudinal (upstream) air speed was lower in  
267 unsteady flow than in smooth flow, but did not differ with flow orientation ( $S-U_{\text{horiz}}$  &  $S-U_{\text{vert}}$ ,  $p \ll$

268 0.0001;  $U_{\text{horiz}}-U_{\text{vert}}$ ,  $p = 0.6533$ ). There were no significant differences in mean longitudinal and lateral  
269 ground speed among flow conditions (Fig. 4A-B), but mean vertical ground speed was higher in the wake  
270 of the horizontal cylinder as compared to the other two flow conditions (Fig. 4C;  $S-U_{\text{horiz}}$ ,  $p = 0.035$ ;  $U_{\text{horiz}}-$   
271  $U_{\text{vert}}$ ,  $p = 0.04$ ;  $S-U_{\text{vert}}$ ,  $p = 0.75$ ).

272 Standard deviations of longitudinal, lateral and vertical velocity were similar across all three flow  
273 conditions (Figs. 4G-I, solid boxes;  $S-U_{\text{horiz}}$ ,  $p = 0.5, 0.4$  &  $0.4$  for longitudinal, lateral and vertical  
274 directions, respectively;  $S-U_{\text{vert}}$ ,  $p = 0.2, 0.8$  &  $0.3$ ;  $U_{\text{horiz}}-U_{\text{vert}}$ ,  $p = 0.8, 0.5$  &  $0.9$ ). However, the flight  
275 trajectories of bees flying upstream in the wind tunnel consisted of motions over a range of frequencies.  
276 Bees typically displayed high-amplitude, low-frequency casting movements while flying upstream; these  
277 smooth, low-frequency motions were less pronounced in unsteady flows, where higher frequency  
278 movements around the flight path were more common (Fig. 5). When the low-frequency casting  
279 maneuvers were removed by a 3 Hz high-pass filter, the standard deviation of lateral velocity differed  
280 significantly between flow conditions, with larger lateral velocity fluctuations in both unsteady flow  
281 conditions as compared to smooth flow (Fig. 4H, open boxes;  $S-U_{\text{horiz}}$ ,  $p = 0.02$ ;  $S-U_{\text{vert}}$ ,  $p < 0.001$ ;  $U_{\text{horiz}}-$   
282  $U_{\text{vert}}$ ,  $p = 0.002$ ), and the highest lateral fluctuations generated by the vertical cylinder. Standard  
283 deviations of filtered longitudinal and vertical velocity data remained similar across flow conditions.

284 These large fluctuations in lateral velocity at higher frequencies were also manifested as large  
285 fluctuations in lateral acceleration under unsteady flow conditions, with the standard deviation of lateral  
286 accelerations being highest in the wake of the vertical cylinder (Fig. 6B;  $S-U_{\text{horiz}}$ ,  $p < 0.001$ ;  $S-U_{\text{vert}}$ ,  $p <$   
287  $0.001$ ;  $U_{\text{horiz}}-U_{\text{vert}}$ ,  $p < 0.001$ ). Vertical acceleration fluctuations were generally lower than lateral ones,  
288 but the standard deviation of vertical accelerations was significantly higher in unsteady flow generated  
289 by the horizontal cylinder than in the other two flow conditions (Fig. 6C;  $S-U_{\text{horiz}}$ ,  $p = 0.006$ ;  $S-U_{\text{vert}}$ ,  $p =$   
290  $0.20$ ;  $U_{\text{horiz}}-U_{\text{vert}}$ ,  $p = 0.03$ ). Acceleration fluctuations in the longitudinal direction were relatively low,  
291 with significantly higher fluctuations in the wake of the vertical cylinder as compared to smooth flow  
292 (Fig. 6A;  $S-U_{\text{horiz}}$ ,  $p = 0.36$ ;  $S-U_{\text{vert}}$ ,  $p = 0.01$ ;  $U_{\text{horiz}}-U_{\text{vert}}$ ,  $p = 0.09$ )

293 Spectral analysis revealed peaks in body acceleration near the vortex shedding frequency in both  
294 unsteady flow conditions (Figs. 6D-F), similar to the velocity spectra (Figs. 4D-F). However, whereas  
295 velocity fluctuations occurred primarily along either the lateral or vertical axis, depending on the  
296 orientation of unsteady flow (Figs. 4D-F), acceleration fluctuations near the shedding frequency  
297 occurred along all three axes in both unsteady flow conditions (Figs. 6D-F).

298

### 299 **Body Orientation**

300 As seen previously in standard deviations of bees' velocities (Figs. 4G-I), the standard deviations of bees'  
301 orientation angles were also affected by the low frequency casting maneuvers that bees performed  
302 while flying upwind (Fig. 5), leading to similar magnitude of roll and yaw fluctuations in the three flow  
303 conditions (Fig. 7A-C, solid boxes;  $S-U_{\text{horiz}}$ ,  $p = 0.2$  &  $0.4$  for roll and yaw, respectively;  $S-U_{\text{vert}}$ ,  $p = 0.8$  &  
304  $0.8$ ;  $U_{\text{horiz}}-U_{\text{vert}}$ ,  $p = 0.2$  &  $0.4$ ). The pitch angle fluctuations were higher in both unsteady flow conditions  
305 as compared to smooth flow (Fig. 7B, solid boxes (significance bars not shown);  $S-U_{\text{horiz}}$ ,  $p = 0.04$   $S-U_{\text{vert}}$ ,  $p$   
306  $= 0.01$   $U_{\text{horiz}}-U_{\text{vert}}$ ,  $p = 0.5$ ). However, when low frequency casting motions are removed with a 3 Hz high-  
307 pass filter, it becomes clear that bees experience significantly more high-frequency roll fluctuations in  
308 both unsteady flow conditions, as compared to smooth flow (Fig. 7A, open boxes;  $S-U_{\text{horiz}}$ ,  $p \ll 0.0001$ ;  $S-$   
309  $U_{\text{vert}}$ ,  $p \ll 0.0001$ ;  $U_{\text{horiz}}-U_{\text{vert}}$ ,  $p = 0.1$ ). Differences in pitch and yaw fluctuations were also significant  
310 between unsteady and smooth flow conditions (Figs. 7B-C;  $S-U_{\text{horiz}}$ ,  $p = 0.001$  &  $0.002$ ;  $S-U_{\text{vert}}$ ,  $p = 0.007$  &  
311  $0.02$ ), but not among unsteady flow conditions (Figs 7B-C;  $U_{\text{horiz}}-U_{\text{vert}}$ ,  $p = 0.4$  &  $0.5$ ).

312 Distinct peaks in roll fluctuations (as well as lesser peaks in yaw and pitch) near the vortex shedding  
313 frequency were present in the wake of the vertical cylinder (Fig. 7D-F), demonstrating that this unsteady  
314 flow pattern destabilized bees, particularly around the roll axis. Surprisingly, no clear peaks in pitching or  
315 other body rotations were present in the wake of the horizontal cylinder (Fig. 7D-F), despite the  
316 presence of peaks in the vertical air speed of bees (Fig. 4D-F). Spectra of rotation rates (not shown) were  
317 similar to those of the orientation angles themselves.

318 Variations in mean (absolute) rotation rates indicated that much higher rotation rates occurred around  
319 the rolling axis as compared to pitch or yaw in all three flow conditions (Fig. 8A-C). Mean rolling rates in  
320 excess of 500 degrees/sec were commonly experienced by the bees in unsteady conditions. Rolling rates  
321 were significantly higher in both unsteady flow conditions as compared to smooth flow, and were higher  
322 behind the vertical cylinder as compared to the horizontal one (Fig. 8A;  $S-U_{\text{horiz}}$ ,  $p \ll 0.0001$ ,  $S-U_{\text{vert}}$ ,  $p \ll$   
323  $0.0001$ ;  $U_{\text{horiz}}-U_{\text{vert}}$ ,  $p = 0.003$ ). Pitching rates were much lower than rolling rates, but bees pitched more  
324 quickly in unsteady as compared to smooth flow (Fig. 8B;  $S-U_{\text{horiz}}$ ,  $p = 0.001$ ,  $S-U_{\text{vert}}$ ,  $p = 0.0001$ ,  $U_{\text{horiz}}-$   
325  $U_{\text{vert}}$ ,  $p = 0.7$ ), and yawing rates were the lowest, but still significantly higher in unsteady flow ( $S-U_{\text{horiz}}$ ,  $p$   
326  $= 0.004$ ,  $S-U_{\text{vert}}$ ,  $p = 0.0002$ ,  $U_{\text{horiz}}-U_{\text{vert}}$ ,  $p = 0.2$ ). The standard deviation of rotation rates (Fig. 8D-F) was  
327 generally higher than the absolute mean, but variations between smooth and unsteady conditions were

328 similar, with all flow conditions producing the largest fluctuations around the roll axis, followed by pitch  
329 and yaw.

330

### 331 ***Relationships between body orientation and translational acceleration***

332 The kinematic analyses revealed a strong cross-correlation (with zero phase lag) between roll angle and  
333 acceleration along the lateral axis of the wind tunnel for bees in smooth flow ( $r = 0.7 \pm 0.2$ ,  $n = 14$  bees;  
334 Fig. 9A-B), whereas there was no clear correlation between yaw angle and lateral acceleration ( $r = 0.3 \pm$   
335  $0.3$ ). As expected for voluntary maneuvers (in which a body rotation redirects the axis of force  
336 production, leading to translation), the correlation between roll angle and lateral acceleration in smooth  
337 flow was positive, with the largest lateral accelerations coinciding with the largest roll angles (Fig. 9A).

338 In contrast, there was no substantial correlation between roll angle and lateral acceleration during trials  
339 conducted in unsteady flow generated by the vertical cylinder (Fig. 9B). However, when the data was  
340 filtered with a 3 Hz low-pass filter to remove higher frequency motions (in contrast to previous filtering  
341 that excluded low frequency motions), the correlation between roll angle and lateral acceleration again  
342 became positive and significant (Fig. 9C;  $r = 0.7 \pm 0.15$ ). The same pattern was generally true for flight in  
343 unsteady flow generated by the horizontal cylinder (unfiltered:  $r = 0.2 \pm 0.3$ ; filtered:  $r = 0.6 \pm 0.2$ ).

344 The correlation between pitch angle and vertical acceleration was relatively low but positive in smooth  
345 flow ( $r = 0.2 \pm 0.2$ ). In unsteady flow, there was no clear correlation between pitch angle and vertical  
346 acceleration (horizontal cylinder:  $r = 0.1 \pm 0.5$ ; vertical cylinder:  $r = 0.0 \pm 0.2$ ), and filtering with a 3 Hz  
347 low-pass filter did not significantly alter this relationship (horizontal cylinder:  $r = 0.0 \pm 0.3$ ; vertical  
348 cylinder:  $r = 0.3 \pm 0.4$ ).

349

## 350 **DISCUSSION**

### 351 ***Effects of unsteady flow on flight trajectory and stability***

352 In the broader context of insect flight in natural environments, one of the key questions is how well  
353 bumblebees are able to contend with unsteady airflow; ultimately, we would like to know how bees'  
354 capabilities compare both to other flying insects, as well as to the magnitude of unsteady flows that  
355 bees experience in the real world. As compared to the null hypothesis that bees would display

356 translational and rotational fluctuations equal to those present in the external flow (i.e. if they were  
357 massless and had no active or passive control of their position or orientation), it is clear that bees are  
358 quite successful overall at attenuating external flow perturbations (Table 1; note that for the unsteady  
359 flow conditions, only fluctuations at frequencies > 3 Hz were considered, in order to remove the effects  
360 of voluntary casting behavior). Bees typically displayed fluctuations (i.e., standard deviations) in  
361 translational velocity and acceleration that were at least an order of magnitude less than those present  
362 in the external flow, and showed similar levels of attenuation in pitch and yaw angles.

363 Some attenuation of the fluctuations induced by the flow is expected because the bee's mass (inertia)  
364 will passively reduce the magnitude of fluctuations experienced by the bee. However, bees are  
365 undoubtedly also responding actively to minimize and correct for external perturbations through  
366 changes in wing kinematics, as has been shown in honeybees and other flying insects responding to  
367 isolated external perturbations (Vance et al., 2013; Ristroph et al., 2010). Active responses of the bees  
368 could not be determined in this study due to the lack of information on wing kinematics. Even with this  
369 information, it would be difficult to conclusively identify the extent of active response, due to the tight  
370 coupling between disturbance and response, as well as the complex spatial and temporal variation in  
371 external flows. The rapid drop-off in energy of acceleration fluctuations at frequencies higher than the  
372 vortex shedding rate (Fig. 6) suggests that the bees did not respond to disturbances induced by the  
373 vortices with rapid corrective accelerations, but rather responded at rates commensurate with the  
374 disturbances.

375 While bees can clearly attenuate external perturbations along all axes (Table 1), they appear to be less  
376 sensitive (i.e., more stable) to perturbations along the vertical axis, as opposed to the lateral axis.  
377 Fluctuations in vertical acceleration in response to the horizontal cylinder were approximately half the  
378 magnitude of fluctuations in lateral acceleration in response to the vertical cylinder (Fig. 6), and the  
379 energy present at the vortex shedding frequency in the spectra is significantly higher in the latter. This  
380 could imply that bees are more aerodynamically stable along the vertical axis and/or that they are more  
381 adept at actively responding to translational disturbances along this axis. However, the lower magnitude  
382 of fluctuations in pitch as compared to roll under all flow conditions (Fig. 8) suggests that bees may be  
383 "passively" more immune to disturbances along the vertical/pitching axis. In addition, the presence of a  
384 peak in vertical ground speed fluctuations near the vortex shedding frequency in the wake of a  
385 horizontal cylinder, but the absence of a peak in pitching, suggests that the von Karman street arising  
386 from the horizontal cylinder resulted only in translational perturbations along the vertical axis, and did

387 not cause any rotational disturbances or elicit rotational responses in bees at the vortex shedding  
388 frequency.

389 Apart from the passive attenuation of disturbances by virtue of body mass (inertia) and other damping  
390 phenomena (e.g. translational damping by virtue of flapping kinematics, and rotational damping due to  
391 flapping counter torque; Hedrick, 2011), as well as active responses in the form of wing kinematic  
392 modulation, bumblebees likely employ a variety of other active and passive means to resist  
393 perturbations and maintain stability in unsteady flows. Active deflection of various body parts has been  
394 shown to influence stability, such as in orchid bees that extend their limbs when flying in turbulent air to  
395 increase their rolling moment of inertia (Combes and Dudley, 2009). Other studies have shown that  
396 abdominal deflection may augment not only pitching stability, but also translational stability along the  
397 vertical axis (Dyhr et al., 2013). Though no obvious leg extension occurred in the flight sequences  
398 collected for this study, some abdominal deflection was noted qualitatively, which could contribute to  
399 the bees' stability along the vertical/pitching axis.

400 The relatively limited sensitivity to disturbances along both the vertical and longitudinal axes in  
401 comparison to the lateral axis could also arise from the fact that forces are actively produced by the bee  
402 along these axes (lift and thrust, respectively). In steady level flight, as the bee counteracts its drag by  
403 generating thrust (longitudinal axis) and counteracts its weight by generating lift (vertical axis), a  
404 disturbance along these axes will only require a slight modulation of the existing forces to correct for the  
405 influence of the disturbance. However, a disturbance along the lateral axis would be expected to have a  
406 greater influence, since no (or very limited) forces are being produced along this axis, unless the bee is  
407 performing a turning maneuver. Hence, in the case of a lateral disturbance, the bee would need to  
408 correct for the disturbance through inertial reorientation (roll) of its primary force vector.

409 In addition to inherent differences in force production, the rotational moment of inertia of the bee also  
410 varies about its three axes. The rotational moment of inertia is generally lowest around the roll axis,  
411 followed by the pitch and yaw axes (Dudley, 2002), and the differences in rotational fluctuations that  
412 bees experienced around these axes in unsteady flow follow this trend. Bees rolled far more than they  
413 pitched or yawed in all flow conditions, and unsteady flow amplified these trends (Fig. 7-8). Bees also  
414 experienced significantly greater fluctuations in velocity and acceleration along the lateral axis (Figs 4, 6)  
415 with external flow perturbations generated by the vertical cylinder imposing lateral forces of over half  
416 the bees' body weight (Fig. 6B). Intriguingly, our results vary substantially from parallel experiments on  
417 the flight stability of hawkmoths (*Manduca sexta*) (Ortega-Jimenez *et al* in review), which experienced

418 greater fluctuations in yaw than in roll when flying in the wake of a vertical cylinder. It is possible that  
419 the differences in observations are due to experimental conditions; bees in our experiment were  
420 actively flying upsteam to a food source, whereas hawkmoths were maintaining stationary position at a  
421 flower in an oncoming flow. The observed differences may also reflect differences in passive stability or  
422 flight control strategy, since these species vary significantly in morphology, wing loading and flapping  
423 frequency (Ellington, 1984).

424 The spectral and temporal analysis of the flight trajectories allowed us to discern that bees typically  
425 perform voluntary, lateral casting motions at low frequencies (Fig. 5), and that they primarily utilize the  
426 roll axis to perform these lateral maneuvers. Thus, although bees may be more sensitive to disturbances  
427 along the lateral/roll axis, they also appear to be most agile around this axis. Bees may make use of the  
428 relative ease of perturbing stable flight (i.e., for a given amount of torque, a larger roll can be produced  
429 as compared to pitch or yaw) to effect voluntary maneuvers. Similarly, in unsteady flow we would  
430 expect that, although bees experience the largest translational perturbations around the lateral axis,  
431 they would also be capable of responding most quickly and easily by producing a corrective roll in the  
432 opposite direction. This may help explain the relatively low, negative correlation observed between roll  
433 and lateral acceleration over the entire frequency range (Fig. 9C); this likely reflects a combination of  
434 low frequency, voluntary casting maneuvers (with positive correlation; Fig. 9C), external perturbations  
435 producing lateral acceleration and roll in the same direction (positive correlation), and corrective  
436 maneuvers consisting of rolls in the opposite direction (negative correlation).

437 The lack of a strong correlation between yaw angle and lateral acceleration further reinforces the idea  
438 that bees primarily utilize the roll axis for lateral maneuvers (voluntary or corrective). In terms of  
439 vertical maneuvers, the low, positive correlation between pitch and vertical acceleration suggest that  
440 bees only partially utilize inertial reorientation (i.e. pitch) to regulate vertical motion, and likely also  
441 employ other mechanisms, such as altering the magnitude of mean force production through changes in  
442 wing kinematics.

443

#### 444 ***Effects of unsteady flow on energetics and cost of flight***

445 One strategy that fish have been shown to adopt for maintaining position and conserving energy in  
446 unsteady flows is known as Karman gaiting (Liao et al., 2003). The passive and active compliance of the  
447 body to oncoming vortices results in a swaying-undulating motion that enables fish to maintain stable

448 position with minimal energetic cost in highly unsteady flow conditions (Liao, 2007). The large  
449 differences in morphology and force production mechanisms between laterally undulating fish and  
450 flying bees suggests that the interaction of these animals with the oncoming vortices would be  
451 considerably different; hence strategies employed by fish may not be suitable (or even feasible) for  
452 bees. There is however a possibility that bees could actively slalom around oncoming vortices, thereby  
453 reducing their energy expenditure. However, this cannot be ascertained in the absence of information  
454 regarding the instantaneous position of the vortex with respect to the bee, for which additional  
455 experiments combining simultaneous quantitative flow visualization and bee flight path measurements  
456 would be required.

457 Assuming nominally similar mean power output in smooth and unsteady flow, the differences in the  
458 bees' mean air speed along their flight paths suggests that it would take longer to travel a given distance  
459 in unsteady flows (increasing the cost of transport). Though the reduction in mean air speed between  
460 smooth and unsteady flow was only ~8%, this difference was consistent between individuals and  
461 statistically significant. However, further experiments assessing the flight speeds and metabolic power  
462 of bees flying through various intensities and scales of unsteady flow are needed to elucidate the  
463 energetic implications of flying in complex aerial environments. If unsteady air flow in the ABL increases  
464 energetic costs and/or reduces the mean flight speed of bees, this could have direct implications for the  
465 foraging efficiency of bees in natural environments, particularly in windy weather - with potentially  
466 adverse effects on colony energetics, growth and pollination efficiency.

467 Previous work has shown that that fully mixed, turbulent flows have a significant and adverse effect on  
468 the flight of orchid bees (Combes and Dudley, 2009). Here, we show that insect flight is also adversely  
469 affected by structured, unsteady flows (von Karman vortex streets) emanating from objects. Most  
470 interestingly, our results indicate that the orientation of flow structures (vertically *versus* horizontally  
471 aligned vortices) has relatively little effect on how instabilities are manifest in flying bees. Our  
472 expectation was that a horizontally oriented cylinder (creating a vertical perturbation) would induce  
473 variation in pitch angle, whereas a vertically oriented cylinder (creating a lateral perturbation) would  
474 induce variation in yaw angle. However, our results clearly demonstrate that in both unsteady flow  
475 conditions, bees are most unstable about the lateral/roll axis, and that bees make use of this instability  
476 to effect voluntary and corrective maneuvers about this axis as well.

477



478 **REFERENCES**

- 479 **Beal, D. N., Hover, F. S., Triantafyllou, M. S., Liao, J. C. and Lauder, G. V** (2006). Passive propulsion in  
480 vortex wakes. *Journal of Fluid Mechanics* **549**, 385–402.
- 481 **Chapman, J. W., Drake, V. A. and Reynolds, D. R.** (2011). Recent insights from radar studies of insect  
482 flight. *Annual review of entomology* **56**, 337–56.
- 483 **Crall, J. and Combes, S.** (2013). Blown in the wind: Bumblebee temporal foraging patterns in naturally  
484 varying wind conditions. In *Integrative and Comparative Biology*, p. E270. OXFORD UNIV. PRESS  
485 INC.
- 486 **Dickinson, M. H., Lehmann, F. O. and Sane, S. P.** (1999). Wing Rotation and the Aerodynamic Basis of  
487 Insect Flight. *Science* **284**, 1954–1960.
- 488 **Diebel, J.** (2006). *Representing attitude: Euler angles, unit quaternions, and rotation vectors*. Stanford,  
489 California 94301-9010.
- 490 **Drake, V. A. and Farrow, R. A.** (1988). The Influence of Atmospheric Structure and Motions on Insect  
491 Migration. *Annual Review of Entomology* **33**, 183–210.
- 492 **Dudley, R.** (2002). *The Biomechanics of Insect Flight: Form, Function, Evolution*. Princeton University  
493 Press.
- 494 **Dudley, R. and Ellington, C. P.** (1990). Mechanics of forward flight in bumblebees: I. Kinematics and  
495 morphology. *Journal of Experimental Biology* **148**, 19–52.
- 496 **Dyhr, J. P., Morgansen, K. A., Daniel, T. L. and Cowan, N. J.** (2013). Flexible strategies for flight control:  
497 an active role for the abdomen. *Journal of Experimental Biology* **216**, 1523–1536.
- 498 **Ellington, C. P.** (1984). The Aerodynamics of Hovering Insect Flight. II. Morphological Parameters.  
499 *Philosophical Transactions of the Royal Society B: Biological Sciences* **305**, 17–40.
- 500 **Ellington, C. P.** (1991). Limitations on animal flight performance. *Journal of Experimental Biology* **160**,  
501 71–91.
- 502 **Ellington, C. P., Van den Berg, C., Willmott, A. P. and Thomas, A. L. R.** (1996). Leading-edge vortices in  
503 insect flight. *Nature* **384**, 626–630.
- 504 **Feltwell, J.** (1982). *Large White Butterfly: The Biology, Biochemistry, and Physiology of Pieris Brassicae*  
505 (*Linnaeus*). Dr. W. Junk Publishers.
- 506 **Heinrich, B.** (2004). *Bumblebee economics*. Harvard University Press.
- 507 **Hendry, G.** (1989). *Midges in Scotland*. Mercat Press.

- 508 **Liao, J. C.** (2007). A review of fish swimming mechanics and behaviour in altered flows. *Philosophical*  
509 *transactions of the Royal Society of London. Series B, Biological sciences* **362**, 1973–93.
- 510 **Liao, J. C., Beal, D. N., Lauder, G. V and Triantafyllou, M. S.** (2003). Fish exploiting vortices decrease  
511 muscle activity. *Science (New York, N.Y.)* **302**, 1566–9.
- 512 **Miller, L. A. and Peskin, C. S.** (2009). Flexible clap and fling in tiny insect flight. *The Journal of*  
513 *experimental biology* **212**, 3076–90.
- 514 **Nicholas, I. K.** (2012). Automated Kinematic Extraction of Wing and Body Motions of Free Flying Diptera.
- 515 **Roshko, A.** (1961). Experiments on the flow past a circular cylinder at very high Reynolds number.  
516 *Journal of Fluid Mechanics* **10**, 345.
- 517 **Sane, S. P.** (2003). The aerodynamics of insect flight. *Journal of Experimental Biology* **206**, 4191–4208.
- 518 **Stull, R. B.** (1988). *An Introduction to Boundary Layer Meteorology*. Springer.
- 519 **Vickery, B. J.** (1966). Fluctuating lift and drag on a long cylinder of square cross-section in a smooth and  
520 in a turbulent stream. *Journal of Fluid Mechanics* **25**, 481.
- 521 **Walker, S. M., Thomas, A. L. R. and Taylor, G. K.** (2012). Operation of the alula as an indicator of gear  
522 change in hoverflies. *Journal of the Royal Society, Interface / the Royal Society* **9**, 1194–207.
- 523 **Wang, Z. ~J.** (2005). Dissecting Insect Flight. *Annual Review of Fluid Mechanics* **37**, 183–210.
- 524 **Watkins, S., Milbank, J., Loxton, B. J. and Melbourne, W. H.** (2006). Atmospheric Winds and Their  
525 Implications for Microair Vehicles. *AIAA Journal* **44**, 2591–2600.
- 526 **Willmott, A. P. and Ellington, C. P.** (1997). The mechanics of flight in the hawkmoth *Manduca sexta*. I.  
527 Kinematics of hovering and forward flight. *Journal of Experimental Biology* **200**, 2705–2722.

528

#### 529 **Author contributions**

530 The experiments were performed by S.R. & J.C. Analysis of results and writing of the  
531 manuscript was performed by all authors.

#### 532 **Author competing interests**

533 The authors declare no competing financial interests.

534

#### 535 **Acknowledgements**

536 This work was supported by an NSF Expeditions in Computing grant to S.C. (CCF-0926158).  
537

538

539

540

541

542

543

544

545 **Figures**

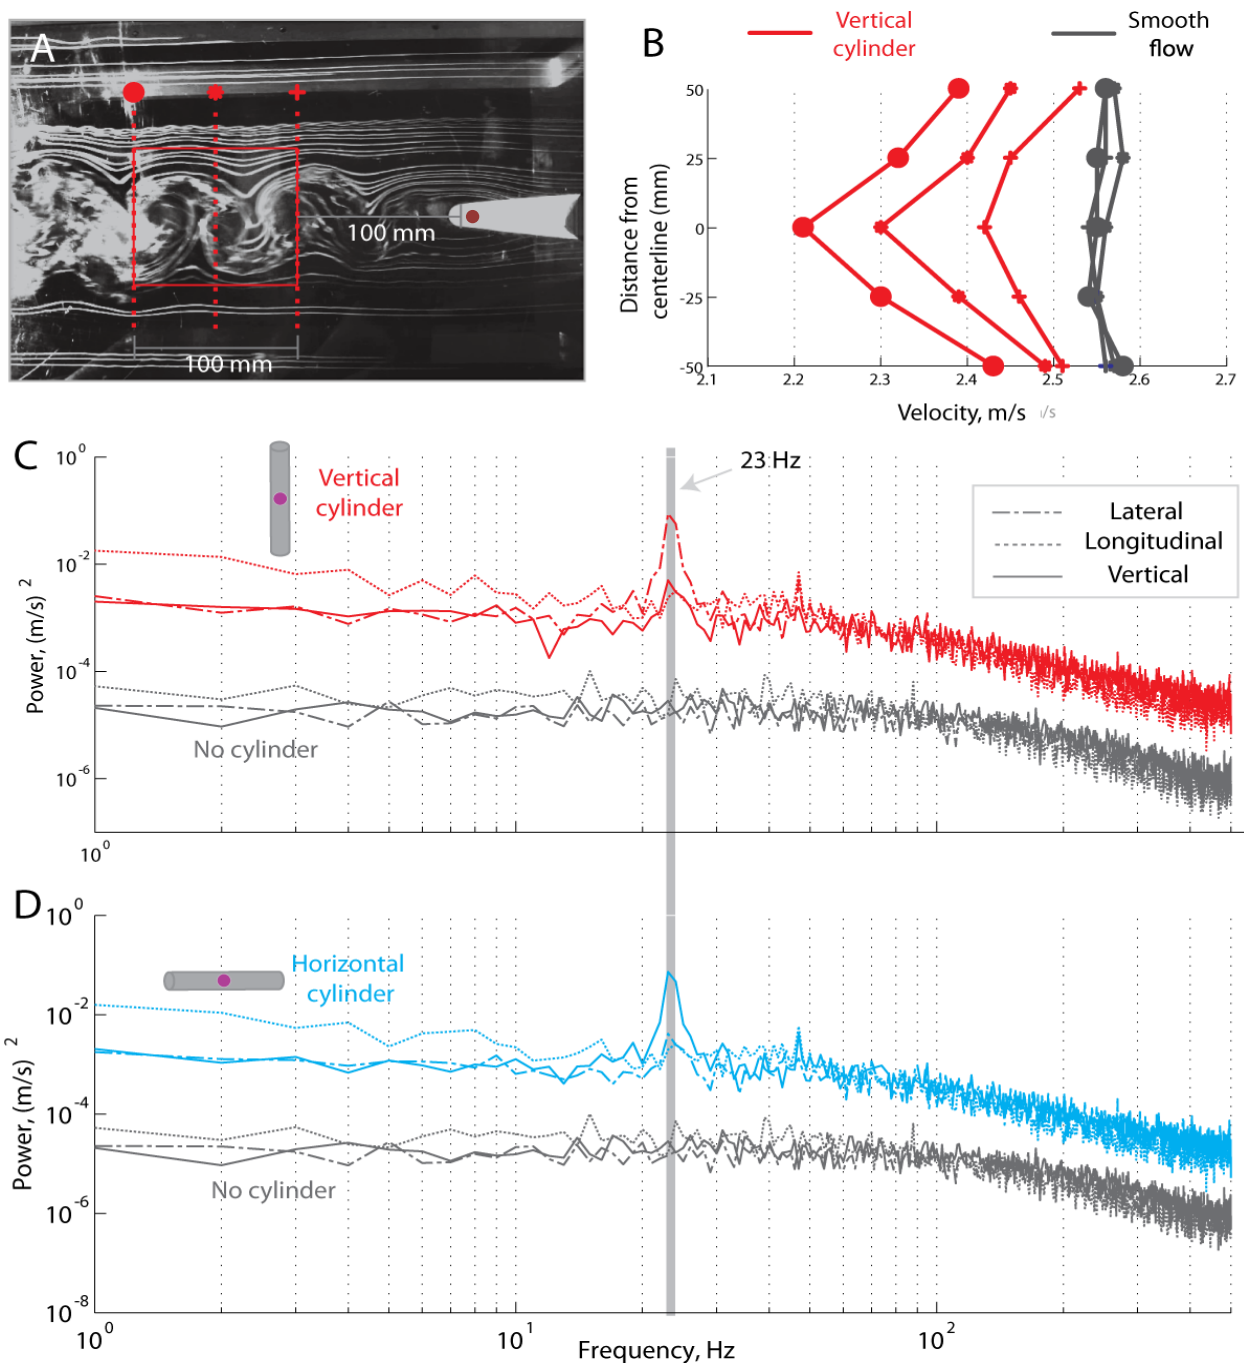

546

547 Figure 1: (A) Smoke flow visualization showing the von Karman vortex street in the wake of the vertical  
 548 cylinder. Position and orientation of bees was measured within a cube of 100 mm side length, the  
 549 location of which is depicted by the red square. The purple marker seen in the center of the cylinder  
 550 represents the artificial flower. (B) Mean wind velocity measured at different locations within the 100  
 551 mm cube (locations shown by symbols in A). (C & D) Spectra of velocity fluctuations measured along the  
 552 three axes in the wake of the vertical and horizontal cylinder, respectively, as well as with no cylinder  
 553 present.

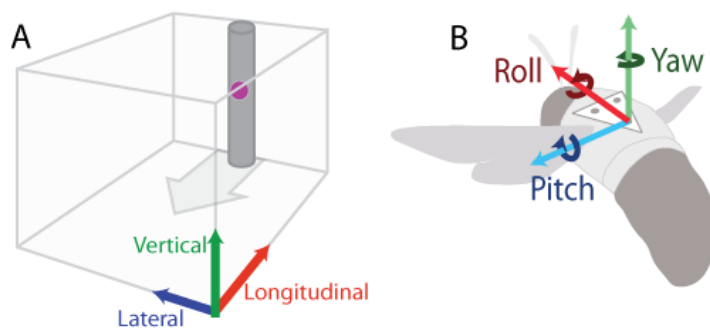

554  
 555 Figure 2: (A) Global coordinate system used for measurements of the position of bees. (B) Local  
 556 coordinate system used for measurements of body orientation of bees.  
 557

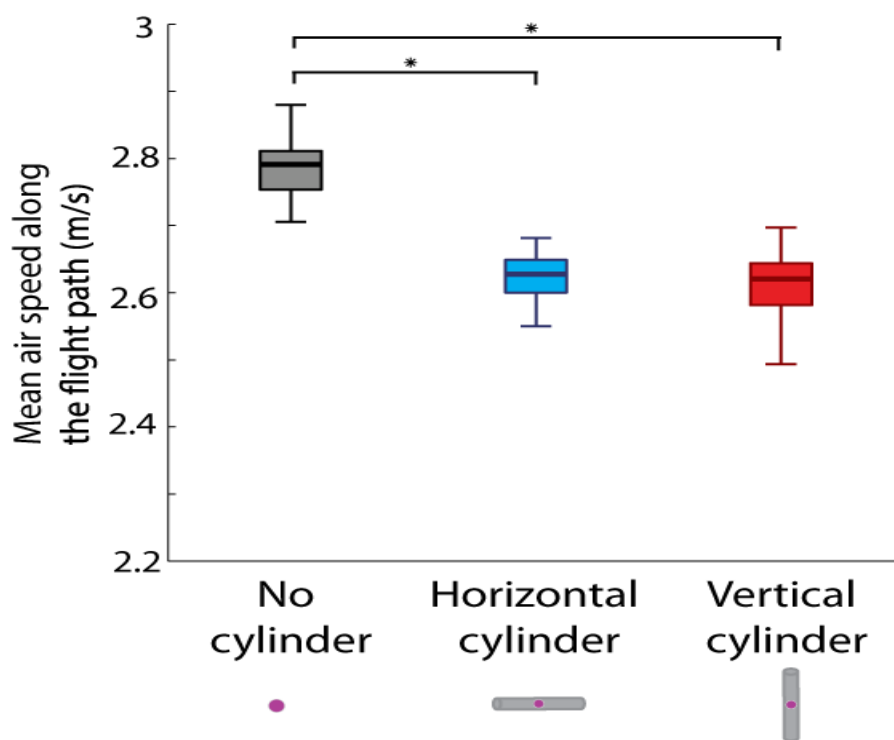

558  
 559 Figure 3: Mean air speed of bees ( $n = 14$ ) along their flight trajectories in the three flow conditions

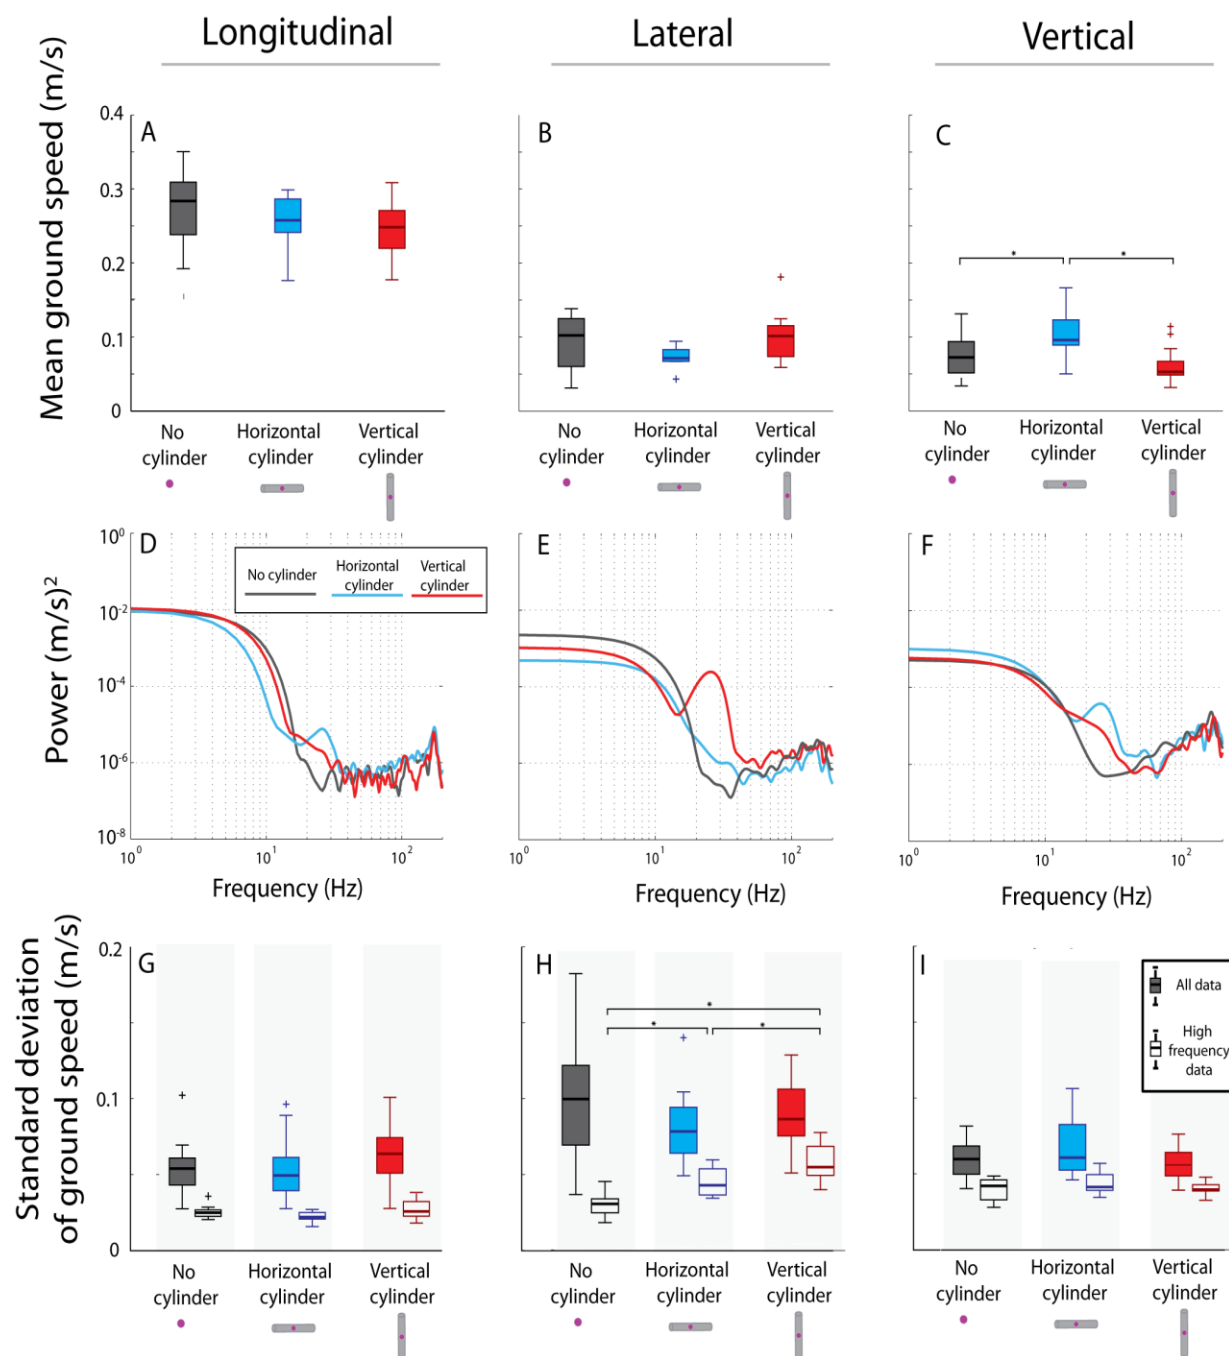

560

561 Figure 4: (A-C) Mean ground speed of bees ( $n = 14$ ) along the longitudinal, lateral and vertical axes of the  
 562 wind tunnel in the three flow conditions. For (B & C), mean lateral and vertical ground speed was equal  
 563 to the mean air speed along those axes. (D-F) Power spectral density of an individual bee's velocity along  
 564 each axis in the different flow conditions. (G-I) Standard deviation of the bees' velocities along each axis;  
 565 data for full flight trajectories are shown by solid boxes, and those derived from only higher frequency  
 566 motions ( 3 Hz high-pass filtered data) by open boxes.

567

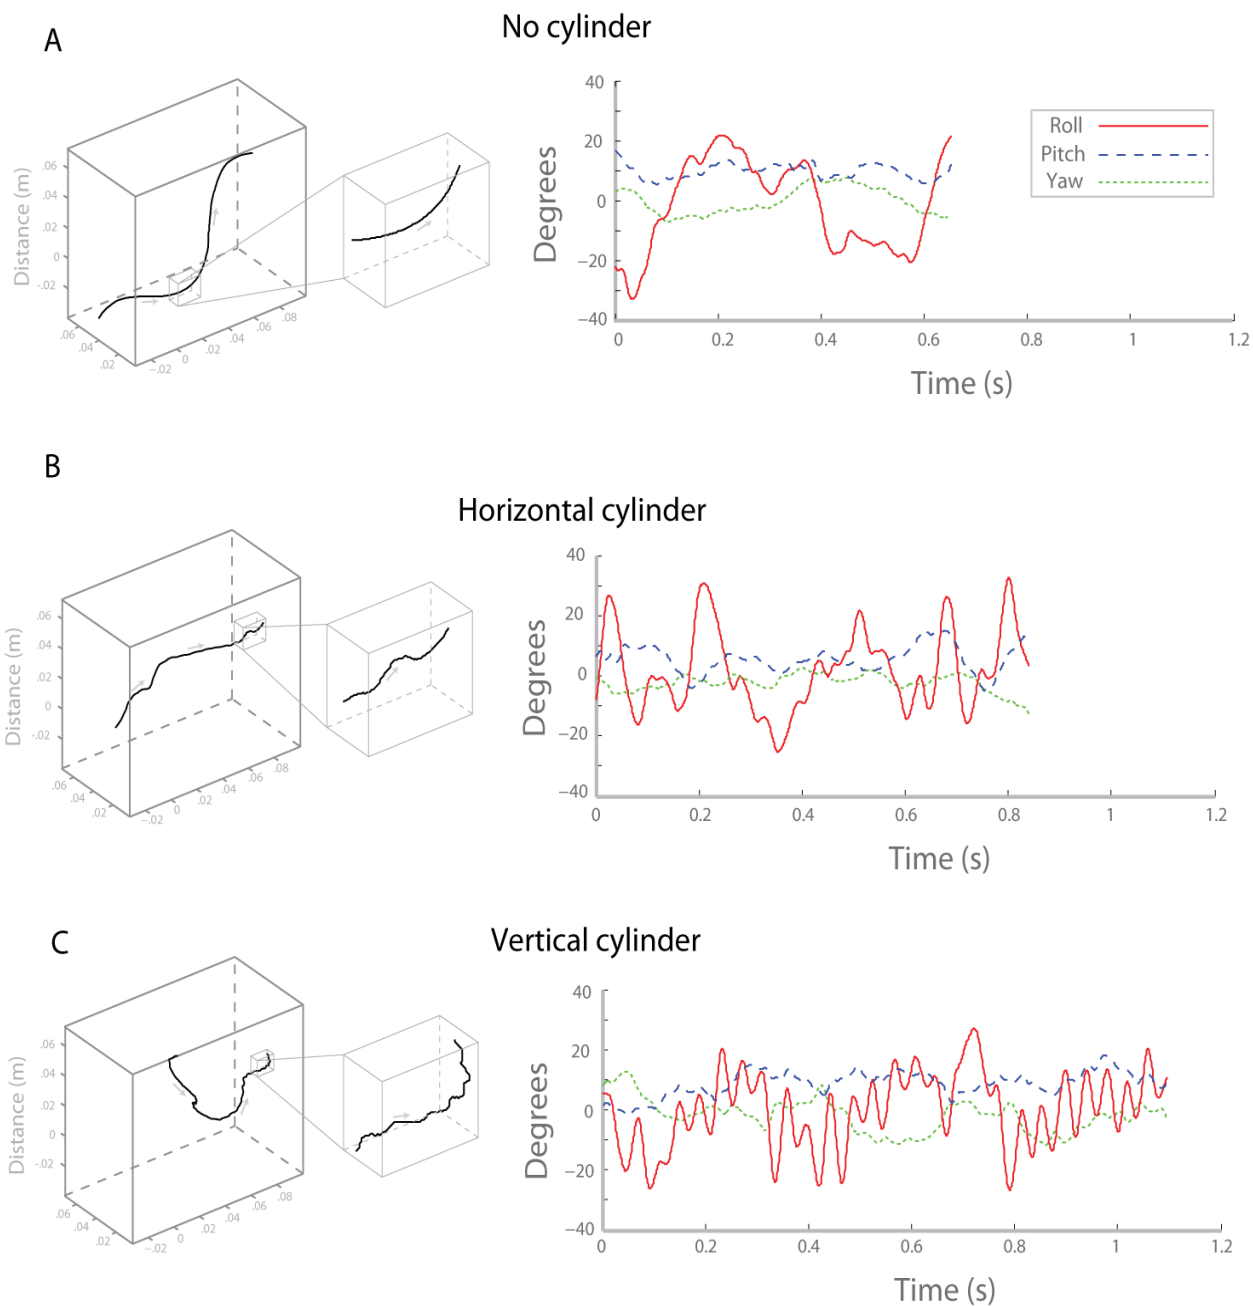

568

569 Figure 5: (A-C) Typical flight trajectories and body orientations of a bee in each flow condition. 3-d  
 570 trajectory (in cm) within the wind tunnel is shown on the left, with movements within the interrogation  
 571 volume shown by the inset. Instantaneous roll, pitch and yaw while flying through the interrogation  
 572 volume is shown on the right.

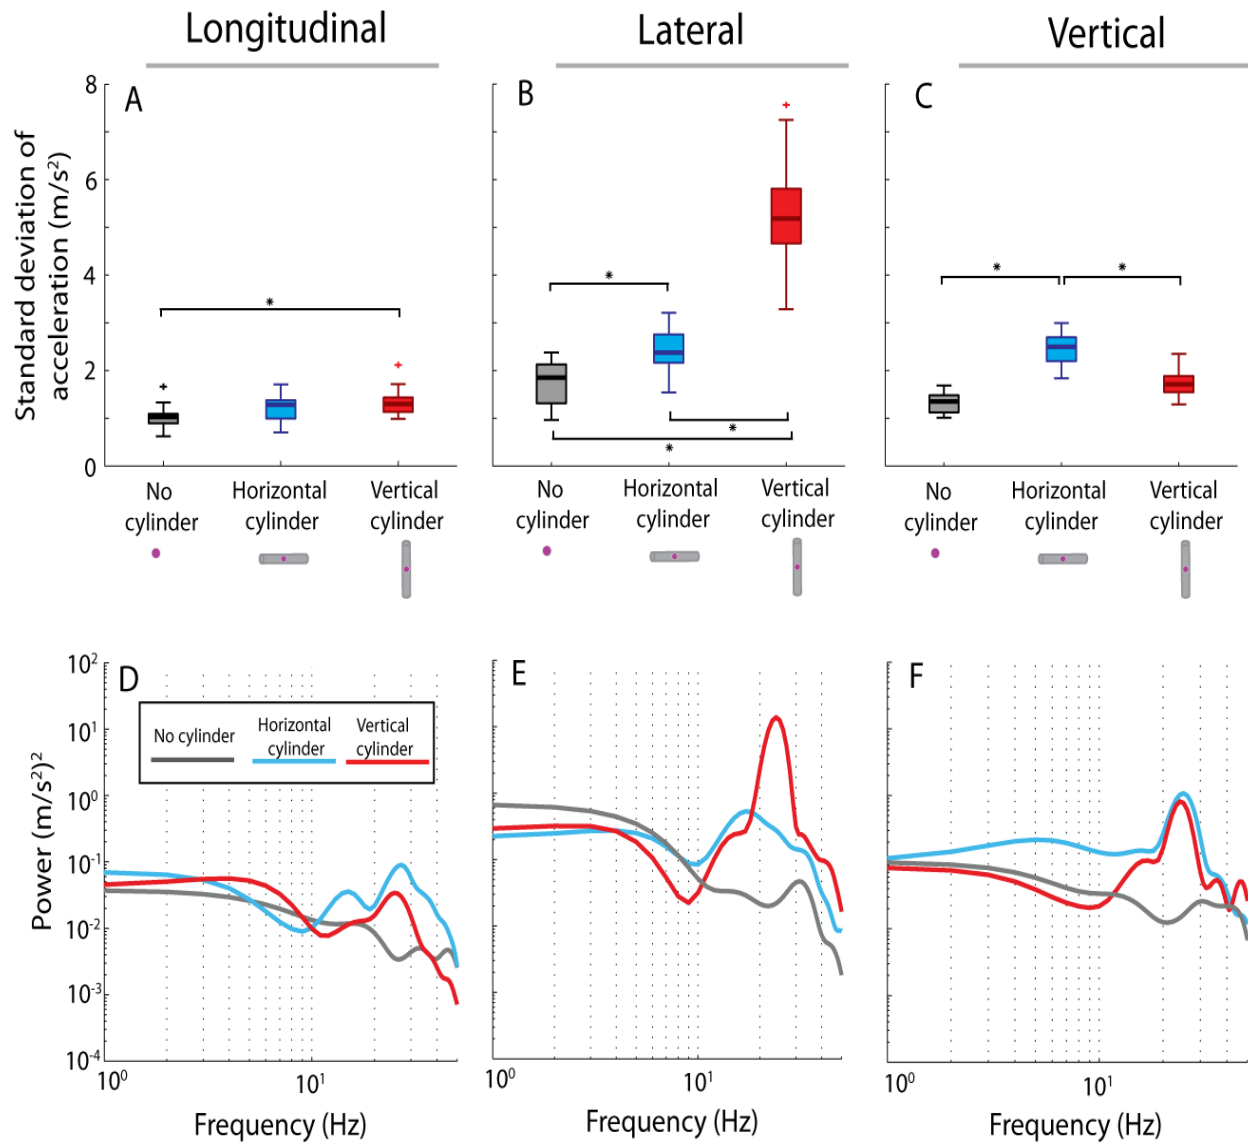

573

574 Figure 6: (A-C) Standard deviation of bees' accelerations along the longitudinal, lateral and vertical axes  
 575 of the wind tunnel in the three flow conditions. (D-F) Power spectral density of an individual bee's  
 576 acceleration along each axis in the different flow conditions. For analysis of accelerations, data was  
 577 passed through a 50Hz low-pass filter.



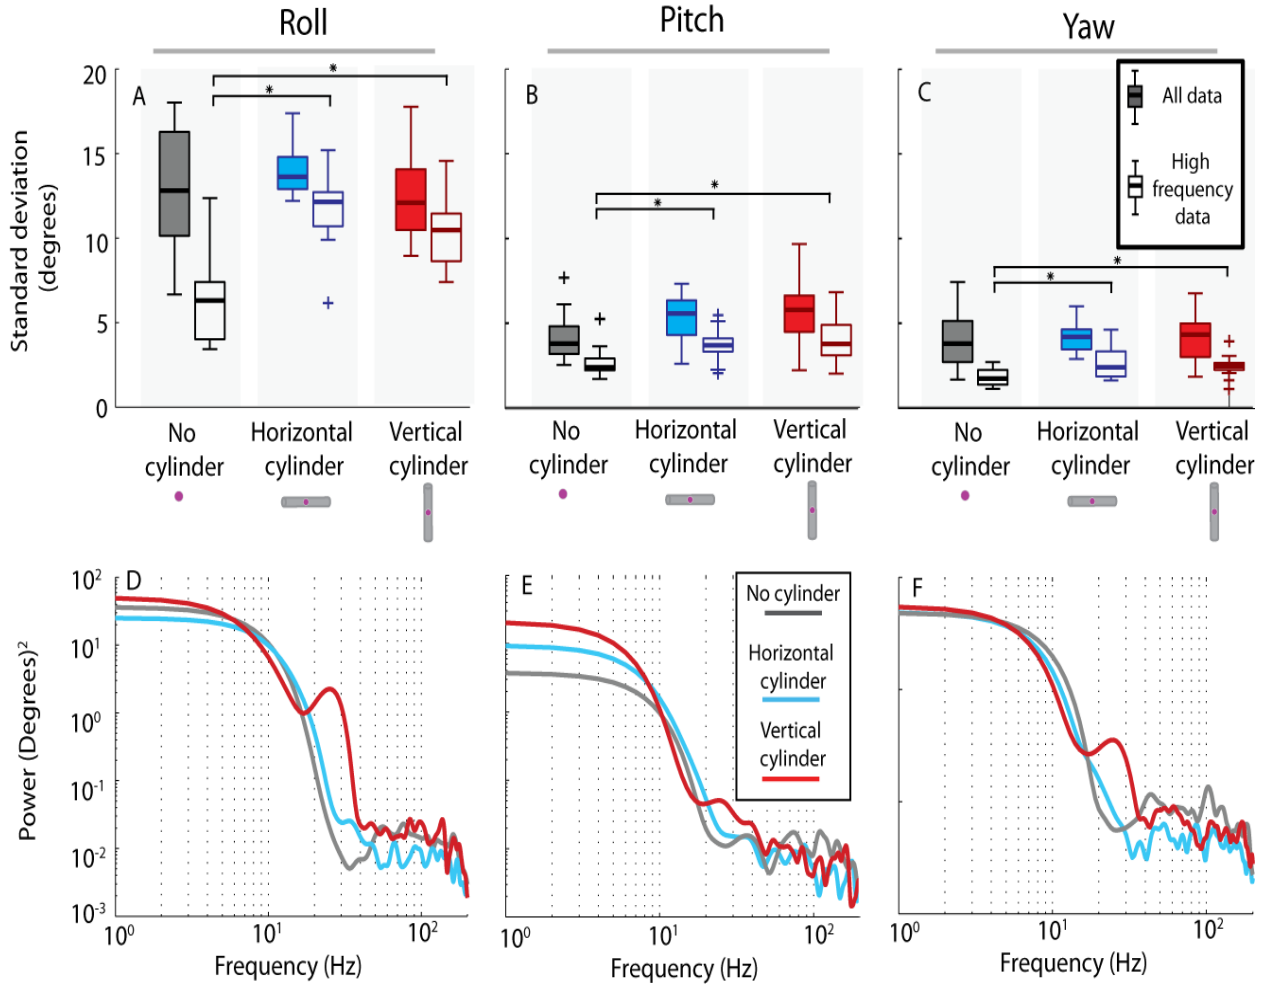

578

579 Figure 7: (A-C) Standard deviation of bees' orientation angles along each body axis (full dataset shown  
 580 by solid boxes and higher frequency/3Hz high-pass filtered data by open ones). (D-F) Power spectral  
 581 density of the roll, pitch and yaw angles of an individual bee in the three flow conditions.

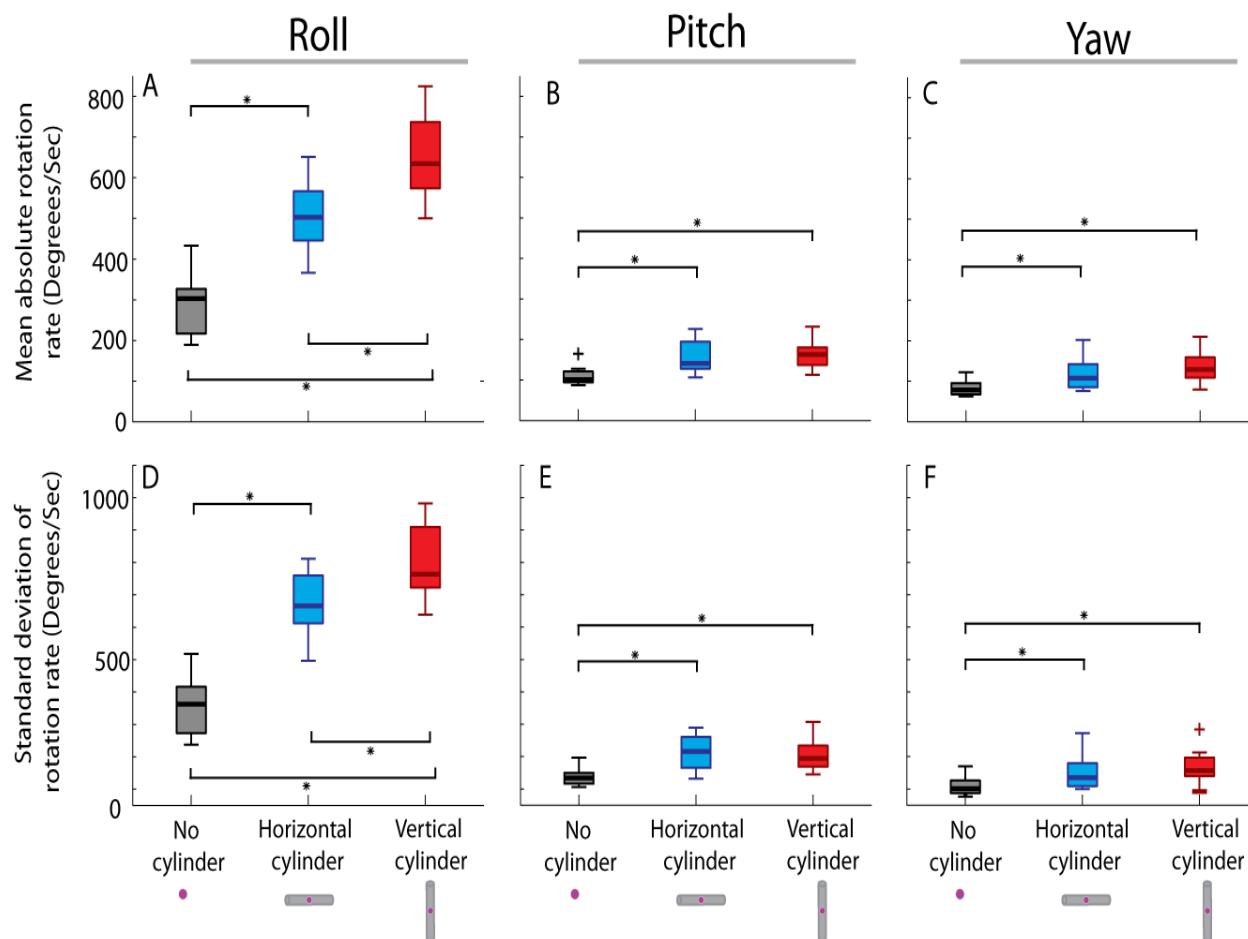

582

583 Figure 8: (A-C) Mean absolute rotation rates of bees, and (D-F) standard deviation of rotation rates in  
 584 each flow condition.

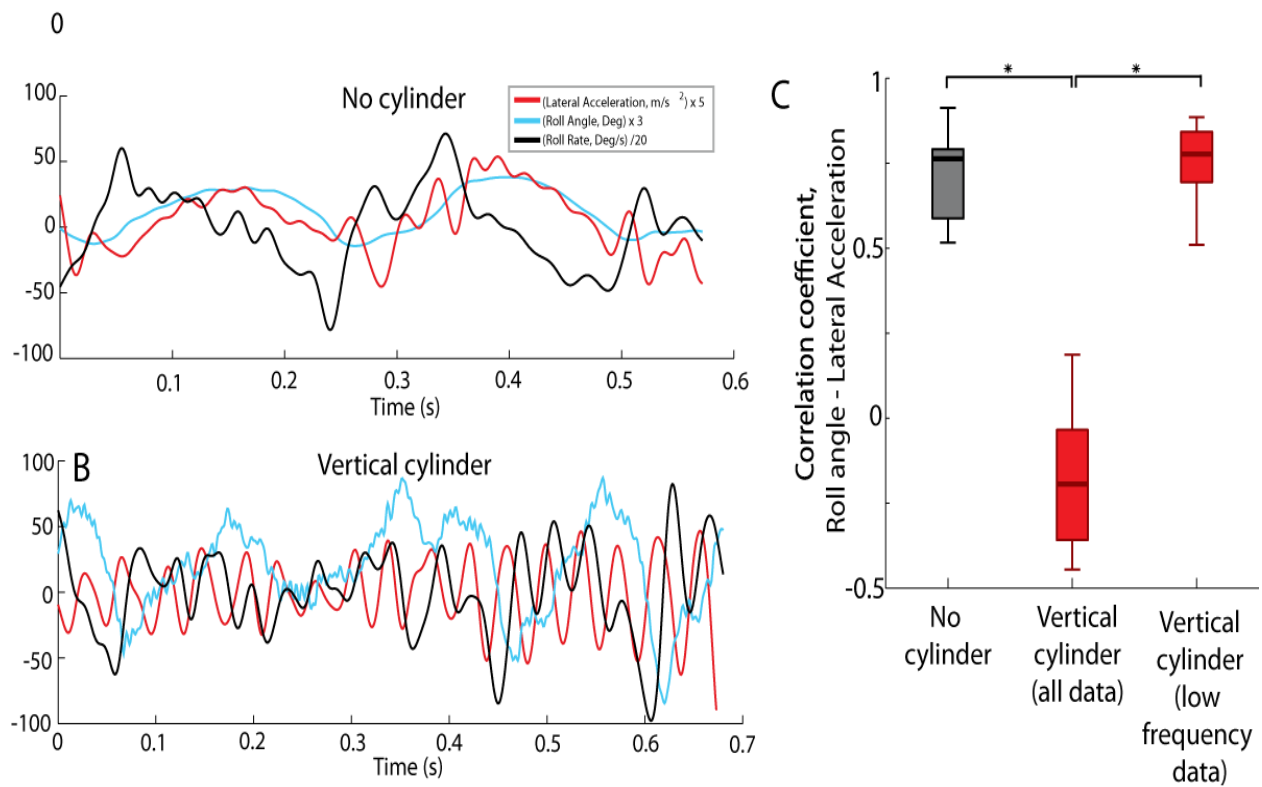

585

586 Figure 9: Time series of the lateral acceleration, roll angle and rolling rate of an individual bee in the no  
 587 cylinder (A) and vertical cylinder (B) conditions. Note that ordinate scales are different in A and B. (C)  
 588 The zero-time-shift correlation between roll angle and lateral acceleration of bees ( $n = 14$ ) in smooth  
 589 flow (left), in the wake of the vertical cylinder (center), and in the same wake with higher frequency  
 590 motions removed through filtering (right).

591

592

593

594

595

596

597

598

599

600

|                           | Smooth Flow (No Cylinder) |            | Horizontal Cylinder |             | Vertical Cylinder |             |
|---------------------------|---------------------------|------------|---------------------|-------------|-------------------|-------------|
|                           | Flow                      | Bees       | Flow                | Bees        | Flow              | Bees        |
| Longitudinal Velocity     | 0.065                     | 0.02±0.005 | 0.31                | 0.02±0.005  | 0.32              | 0.03±0.007  |
| Lateral Velocity          | 0.056                     | 0.03±0.01  | 0.3                 | 0.043±0.01  | 0.69              | 0.056±0.01  |
| Vertical Velocity         | 0.061                     | 0.04±0.007 | 0.71                | 0.046±0.005 | 0.29              | 0.042±0.005 |
| Longitudinal Acceleration | 7.1                       | 1.2±0.02   | 51.6                | 1.6±0.05    | 50.5              | 1.7±0.05    |
| Lateral Acceleration      | 4.9                       | 1.6±0.4    | 102.2               | 2.7±0.5     | 49.5              | 5.2±0.7     |
| Vertical Acceleration     | 5.3                       | 1.1±0.1    | 47.9                | 2.5±0.2     | 106.5             | 2±0.1       |
| Roll                      | -                         | 6°±3°      | -                   | 11°±2°      | -                 | 10°±3°      |
| Pitch                     | 1.5°                      | 3°±1°      | 20.6°               | 4°±2°       | 12.3°             | 4°±2°       |
| Yaw                       | 1.3°                      | 2°±1°      | 11.1°               | 3°±2°       | 19.2°             | 4°±1°       |

601 Table 1: Summary of the standard deviations of velocity, acceleration, and rotation along each axis, in  
602 the oncoming flow as compared to in bees (averaged across all bees ± standard deviation,  $n = 14$ ). For all  
603 flight trajectories, only fluctuations above 3Hz (excluding voluntary, low frequency motions) are shown.  
604 Longitudinal, lateral and vertical velocity was measured in m/s, acceleration in  $m/s^2$ , and angles in  
605 degrees.
